# Supplementary material for: An automatic water-occluding device to enable laryngectomee participation in water activities
Source: PubMed Central journal article supplement (PMC8437266; doi:10.1371/journal.pone.0257463), 2021-09-13
Supplement: pone.0257463.s001.pdf [file pone.0257463.s001.pdf]

**1. How long has it been since your laryngectomy?**

- a) Less than 6 months
- b) 6 months to a year
- c) 1 year to 2 years
- d) Greater than 2 years

**2. What form of speech do you prefer to use?**

- a) Sign language
- b) Electrolarynx
- c) Tracheoesophageal speech
- d) Esophageal speech
- e) Other: \_\_\_\_\_

**3. How many times, post-surgery, have you avoided water-related activities because of your laryngectomy?**

- a) 1-3 times
- b) 3-5 times
- c) 5-10 times
- d) 10+ times
- e) Never

**4. What types of water-related activities would you enjoy participating in? Circle all that apply.**

- a) Fishing
- b) Kayaking/canoeing/boating
- c) Water skiing/tubing
- d) Swimming
- e) Snorkeling
- f) Surfing/windsurfing
- g) Parasailing
- h) Other: \_\_\_\_\_

**5. Before your laryngectomy did you participate in water-related activities?**

- a) Yes
- b) No

**5a. If you answered yes, which sports did you participate in? Circle all that apply.**

- a) Fishing
- b) Kayaking/canoeing/boating
- c) Water skiing/tubing
- d) Swimming
- e) Snorkeling
- f) Surfing/windsurfing
- g) Parasailing
- h) Other: \_\_\_\_\_

**5b. How often did you participate in these activities per year? Circle all that apply.**

- a) 1 time
- b) 2-4 times
- c) 4-8 times
- d) 8+ times
- e) Never

**5c. What was the average duration of the water activity? Circle all the apply.**

- a) 5-10 mins
- b) 30 mins - 1 hour
- c) 2-3 hours
- d) 3+ hours
- e) Other: \_\_\_\_\_

**6. Which is your dominant hand?**

- a) Left

b) Right

**7. How likely would you be to use an assistive device to prevent water from accidentally entering the airway during participation in water-related activities?**

- a) Very likely
- b) Likely
- c) Not likely
- d) Highly unlikely
- e) Not sure

**8. What is your intended use of the device?**

- a) Extreme water sports (e.g. Water skiing, snorkeling, scuba diving, etc.)
- b) Relaxation water sports (e.g. Boating, fishing, walking on the beach, etc.)
- c) Moderate water sports (e.g. swimming, kayaking, etc.)
- d) I would not use the device

**9. On a scale from 1-10, rate the ease with which you can breathe during moderate exertion (for example, when walking up stairs). (1 being very easy to breathe, and 10 being very difficult)**

1      2      3      4      5      6      7      8      9      10

**10. Do you currently suffer from any breathing disorders?**

- a) Yes
- b) No

**11. How often would you anticipate taking the device on and off while participating in a water-related activity?**

- a) Always
- b) Occasionally
- c) Never

**12. How much would you be willing to pay for an assistive device that protects the airway from water ingestion while participating in water-related activities?**

- a) Under \$20
- b) \$20-\$40
- c) \$40-\$60
- d) \$60-\$100
- e) \$100+

**14. What do you think is the ideal travel size of an assistive device that protects the airway from water ingestion while participating in water-related activities?**

- a) Pocket Size
- b) Backpack Size
- c) Duffle bag size

**13. Do you have any feedback/suggestions for the current prototype?**

**14. Are there any functions or features we haven't thought of that you think would be helpful or beneficial to be include on the device?**
